# Supplementary material
Source: publisher figshare collection journal article supplement (https://gsajournals.figshare.com/ndownloader/files/25833971)
Supplement: Supplementary file 1 [file 25833971]

**Figure S8.** Telomeres exhibit a high density of the conserved metazoan telomere motif. Dots represent 100% sequence identity between matching windows of 15 bp. The blue box represents the end of a chromosome where the long read aligned uniquely. The green box denotes the segment rich with telomeric repeat sequence (TRS).
